# Supplementary material
Source: HighWire-hosted journal article supplement (https://ez-admanager.com/highwire/filestream/135285/field_highwire_adjunct_files/0/giossi_2032.pdf)
Supplement: giossi_2032.pdf [file giossi_2032.pdf]

# 자발성경동맥박리 환자에서 결합조직이상

## Connective tissue anomalies in patients with spontaneous cervical artery dissection

Alessia Giossi, MD  
 Marco Ritelli, PhD  
 Paolo Costa, MD  
 Andrea Morotti, MD  
 Loris Poli, MD  
 Elisabetta Del Zotto,  
 MD, PhD  
 Irene Volonghi, MD  
 Nicola Chiarelli, PhD  
 Massimo Gamba, MD  
 Paolo Bovi, MD  
 Giampaolo Tomelleri,  
 MD  
 Monica Carletti, MD  
 Nicoletta Ceccarelli,  
 MD  
 Giorgio Meneghetti, MD  
 Michele Morra, MD  
 Mauro Chinaglia, MD  
 Valeria De Giuli, MD  
 Marina Colombi, PhD  
 Alessandro Padovani,  
 MD, PhD  
 Alessandro Pezzini, MD

**목적:** 자발성경동맥박리(spontaneous cervical artery dissection, sCeAD) 환자에서 결합조직이상의 유병률을 조사하였다.  
**방법:** sCeAD 환자와 나이와 성별을 일치시킨 CeAD가 아닌 허혈뇌졸중(non-CeAD IS) 환자에서 68개의 항목을 포함하는 표준검사 프로토콜에 의해 임상적으로 확인할 수 있는 결합조직의 이상징후를 체계적으로 평가하였다. 모든 sCeAD 환자에서는 유전적 결합조직질환에 대해 광범위한 분자연구를 시행하였다.  
**결과:** 84명의 sCeAD(평균 연령, 44.5±7.8세; 남성 66.7%) 환자와 84명의 non-CeAD IS 환자가 등록되었다. sCeAD 환자에서 임상적으로나 분자 진단학적으로 이미 알려져 있는 유전적 결합조직질환에 대해 기준에 맞는 환자는 없었다. 결합조직이상은 sCeAD 환자에서 non-CeAD IS 환자보다 더 빈번하게 관찰되었다(이상 소견의 평균 수, 4.5±3.5 vs 1.9±2.3;  $P<0.001$ ). sCeAD 그룹의 81명(96.4%)의 환자는 적어도 하나 이상의 확인 가능한 징후가 있었고 non-CeAD IS 그룹에서는 55명(6.7%)에 서 있었다( $P<0.001$ ). 골격, 안구와 피부 이상뿐만 아니라 두개안면 형태이상도 sCeAD와 더 강한 관계가 있는 임상징후였다. 결합조직이상을 시사하는 징후는 외상성 CeAD보다 sCeAD 환자에서 더 자주 나타났다(28.6%,  $P<0.001$ ; 이상 소견의 평균 수, 1.7±3.7,  $P=0.045$ ).  
**결론:** 결합조직이상은 sCeAD에서 자주 관찰된다. 이러한 사실은 이 질환의 발병기전이 결합조직의 전신적 이상과 관계가 있다는 가설을 지지한다.

Neurology® 2014;83:2032–2037

**Table 3 Distribution of connective tissue anomalies in patients with sCeAD and non-CeAD IS**

| Connective abnormalities                     | sCeAD (n = 84) | non-CeAD IS (n = 84) | p Value |
|----------------------------------------------|----------------|----------------------|---------|
| <b>At least 1</b>                            | 81 (96.4)      | 55 (66.7)            | <0.001  |
| <b>Sum score</b>                             | 4.5 ± 3.5      | 1.9 ± 2.3            | <0.001  |
| <b>Organ involvement</b>                     |                |                      |         |
| <b>Bone and joints<sup>a</sup></b>           | 57 (67.9)      | 28 (33.3)            | <0.001  |
| Gorling sign                                 | 8 (9.5)        | 1 (1.2)              | 0.034   |
| Elbow recurvatum                             | 14 (16.7)      | 5 (6.0)              | 0.049   |
| Scoliosis                                    | 19 (22.6)      | 4 (4.8)              | 0.001   |
| Pectus excavatum                             | 14 (16.7)      | 1 (1.2)              | <0.001  |
| <b>Beighton score<sup>b</sup></b>            |                |                      |         |
| Mean ± SD                                    | 0.6 ± 1.1      | 0.1 ± 0.5            | 0.001   |
| ≥2                                           | 14 (16.7)      | 3 (3.6)              | 0.009   |
| <b>Marfan-like habitus</b>                   | 15 (17.9)      | 5 (6.0)              | 0.030   |
| <b>Skin<sup>a</sup></b>                      | 35 (41.7)      | 20 (23.8)            | 0.014   |
| Mild skin hyperextension                     | 16 (19.0)      | 6 (7.1)              | 0.038   |
| <b>Eye<sup>a</sup></b>                       | 39 (46.4)      | 25 (29.8)            | 0.026   |
| <b>Craniofacial dysmorphisms<sup>a</sup></b> | 41 (48.8)      | 20 (23.8)            | 0.001   |
| Decrease of subcutaneous adipose tissue      | 16 (19.0)      | 4 (4.8)              | 0.07    |
| Thin lips                                    | 9 (10.7)       | 2 (2.4)              | 0.05    |
| <b>Other organs<sup>a</sup></b>              | 14 (16.7)      | 7 (8.3)              | 0.160   |

Abbreviations: IS = ischemic stroke; sCeAD = spontaneous cervical artery dissection.

Data are mean ± SD or n (%).

<sup>a</sup>No. of patients with at least one sign involving the specific organ or system.

<sup>b</sup>Individual score values range, 0–9 (0–1 point for each item).
